# Supplementary material for: Rhipicephalus bursa Sialotranscriptomic Response to Blood Feeding and Babesia ovis Infection: Identification of Candidate Protective Antigens
Source: Front Cell Infect Microbiol. 2018 May 4;8:116. doi: 10.3389/fcimb.2018.00116 (PMC5945973; doi:10.3389/fcimb.2018.00116)
Supplement: Supplementary file 6 [file Table_2.xlsx]

## Sheet: supp tab 2
Supplementary Table 2: List of primers used for double-stranded RNA synthesis.
Target gene	Protein encoded (UniProt ID)	mRNA sequence	Upstream/downstream primer sequence 5´-3´*	Fragment size (bp)	PCR annealing conditions
Putative glycine rich	L7M1K6	GACK01008016	ACGTGTTCGGCCTATCTCAC	436	51ºC/30s
			TGGCGATTCAAGTACACCAG
Secreted cement	A0A034WWS7	GBBO01000019	CGGTGGATATGGTGCTCTTT	411	51ºC/30s
			GGGAAACCTCCGTATGATCC
Vitellogenin-3	A0A034WWF8	GBBR01000108	CCGCCAAGGTTCTGTTGTAT	412	51ºC/30s
			GCATCTTCGCTCCTCTGTTC
Lachesin	L7M018	GACK01007634	GCGCTGGTGTCTTTAGGTTC	440	55ºC/30s
			GTGGCATAGCACTCCAAGGT
β-2-microglobulin (β2M)	P01887	NM_009735	CACCCCCACTGAGACTGATACA	450	64 ºC/30s
			AATTAGGCCTCTTTGCTTTACCA
*All primers contained T7 promoter sequences (5´-TAATACGACTCACTATAGGGTACT-3´) at the 5´end.
